# Supplementary material for: Polycomb condensates can promote epigenetic marks but are not required for sustained chromatin compaction
Source: PubMed Central journal article supplement (PMC8497513; doi:10.1038/s41467-021-26147-5), 2021-10-07
Supplement: 41467_2021_26147_MOESM1_ESM.pdf [file 41467_2021_26147_MOESM1_ESM.pdf]

## **SUPPLEMENTARY INFORMATION**

Supplementary Figures S1-S4

Supplementary Table S1-S2

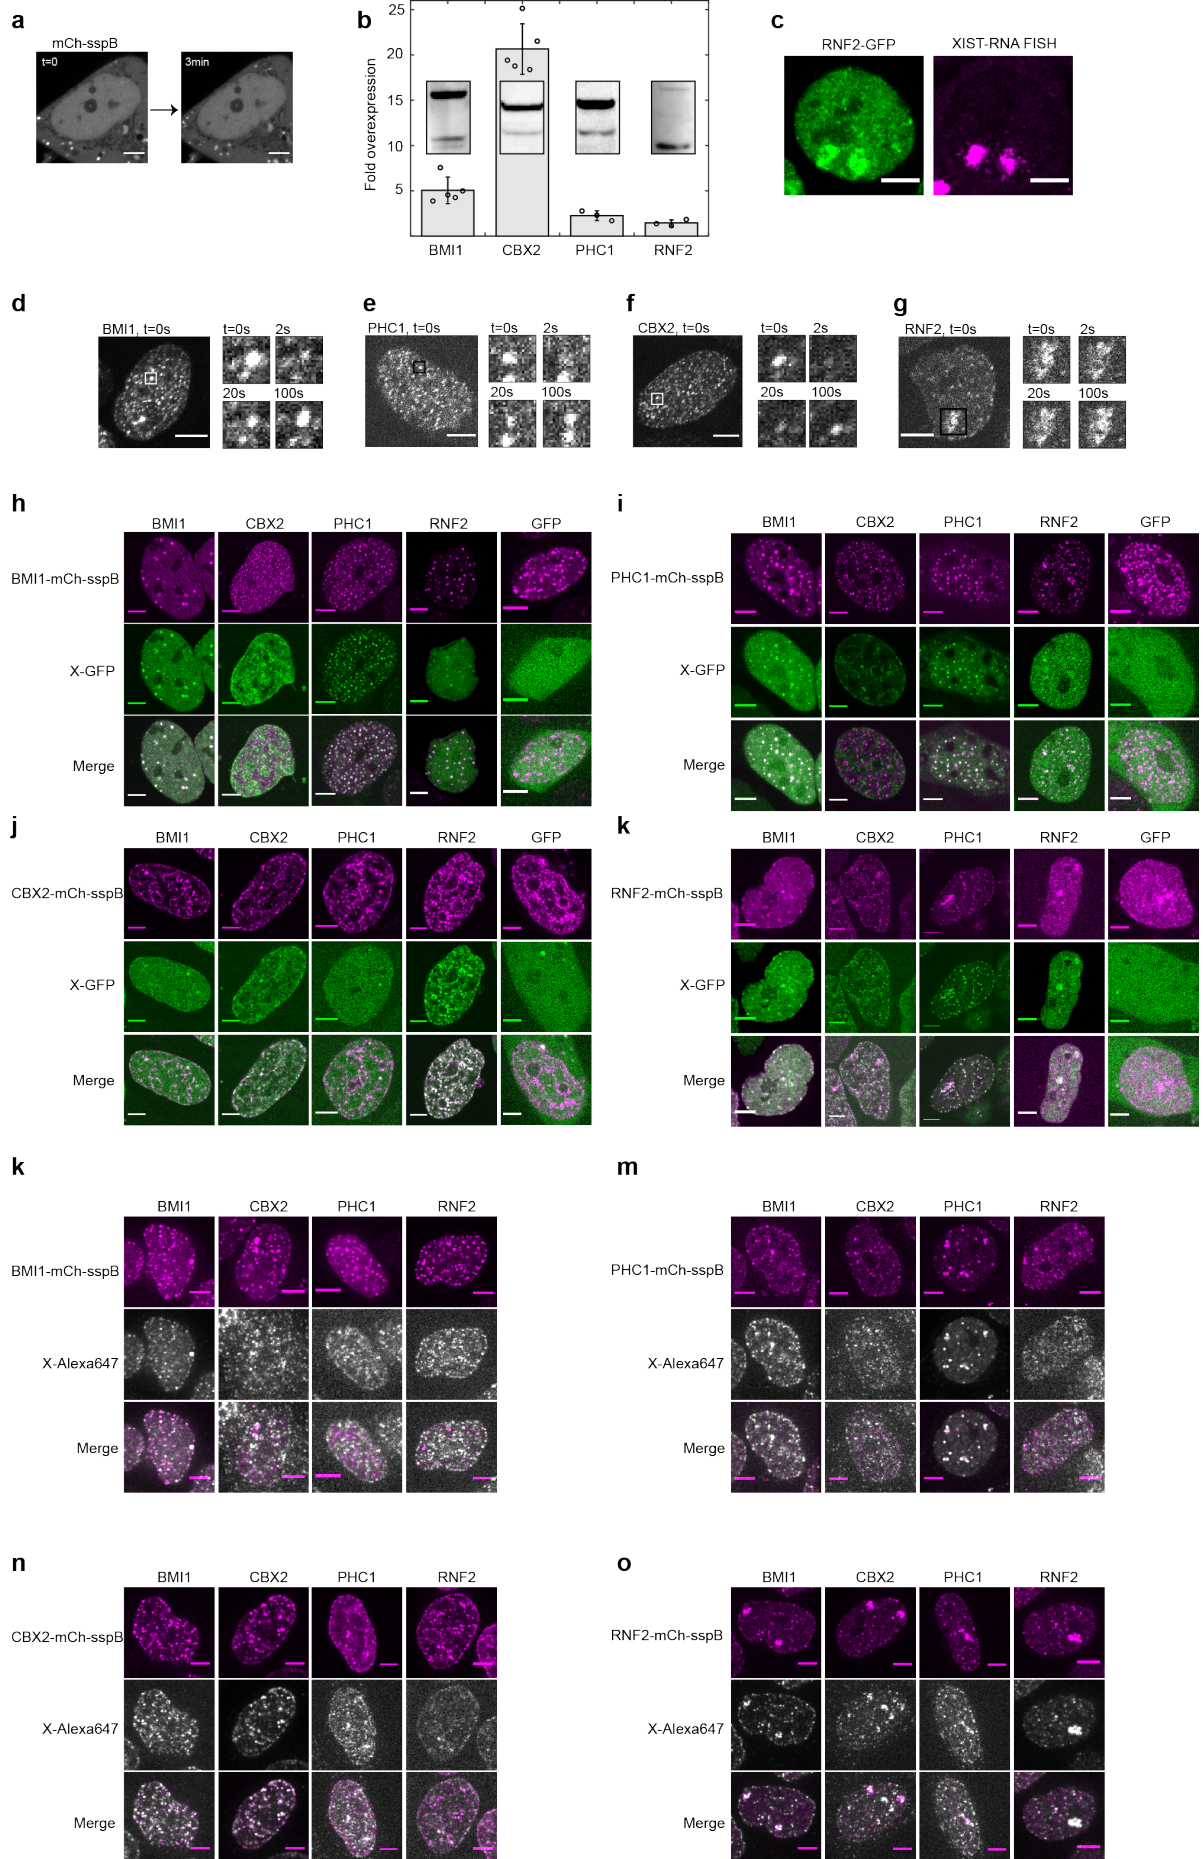

**Figure S1: Characterization of PRC1 corelets and colocalization analysis.**

- a. mCh-sspB in HEK293 cells with NLS-Ferritin-Corelet before (t=0) and after blue light activation (3min). Scale bar is 5 $\mu$ m.
- b. Western blot quantification of overexpressed proteins. Sizes: endogenous BMI1 (43kDa), BMI1-mCh-sspB (89kDa), endogenous CBX2 (70kDa), CBX2-mCh-sspB (116 kDa), endogenous PHC1 (140kDa), PHC1-mCh-sspB (186kDa), endogenous RNF2 (41kDa), RNF2-mCh-sspB (87 kDa). (n=5/5/3/3 biological replicates for BMI1/CBX2/PHC1/RNF2). Data are presented as mean values +/- SD.
- c. RNA-FISH on XIST shows that RNF2 partitions onto the inactive X-chromosomes. Scalebar is 5 $\mu$ m.
- d. Stills of FRAP experiment BMI1-mCh-sspB. Scalebar is 5 $\mu$ m.
- e. Stills of FRAP experiment PHC1-mCh-sspB. Scalebar is 5 $\mu$ m.
- f. Stills of FRAP experiment CBX2-mCh-sspB. Scalebar is 5 $\mu$ m.
- g. Stills of FRAP experiment RNF2-mCh-sspB. Scalebar is 5 $\mu$ m.
- h. Recruitment of PRC1 subunit GFP-fusions to BMI1-mCh-sspB Corelets. Cells were activated for 3 minutes. Scalebar is 5 $\mu$ m.
- i. Recruitment of PRC1 subunit GFP-fusions to PHC1-mCh-sspB Corelets. Scalebar is 5 $\mu$ m.
- j. Recruitment of PRC1 subunit GFP-fusions to CBX2-mCh-sspB Corelets. Scalebar is 5 $\mu$ m.
- k. Recruitment of PRC1 subunit GFP-fusions to RNF2-mCh-sspB Corelets. Scalebar is 5 $\mu$ m.
- l: Recruitment of endogenous PRC1 subunits to BMI1-mCh-sspB Corelets. Scalebar is 5 $\mu$ m.
- m: Recruitment of endogenous PRC1 subunits to PHC1-mCh-sspB Corelets. Scalebar is 5 $\mu$ m.
- n: Recruitment of endogenous PRC1 subunits to CBX2-mCh-sspB Corelets. Scalebar is 5 $\mu$ m.
- o: Recruitment of endogenous PRC1 subunits to RNF2-mCh-sspB Corelets. Scalebar is 5 $\mu$ m.

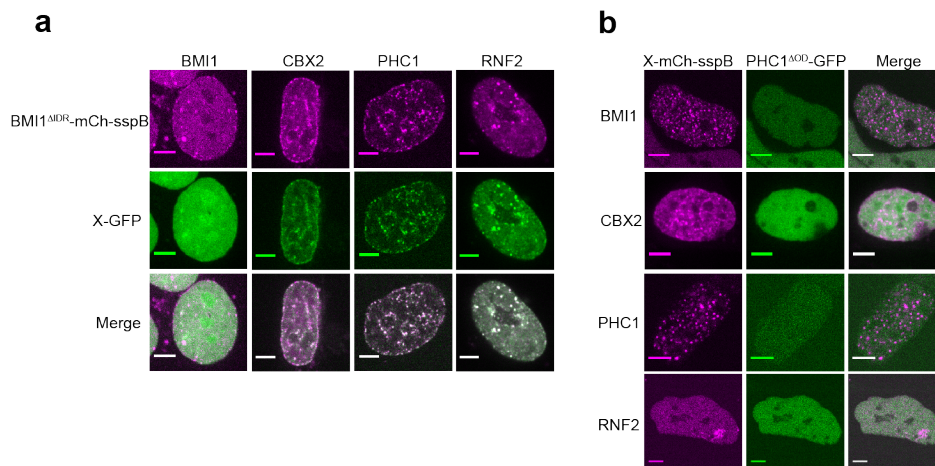

**Figure S2: Colocalization of Bmi1 $\Delta$ IDR and PHC1 $\Delta$ OD with PRC1 proteins**

- a. Recruitment of PRC1 subunits to BMI1 $\Delta$ IDR-mCh-sspB Corelets. Cells were activated for 3 minutes. Scalebar is 5 $\mu$ m.
- b. Recruitment of PHC1 $\Delta$ OD-GFP to PRC1-mCh-sspB Corelets. Scalebar is 5 $\mu$ m.

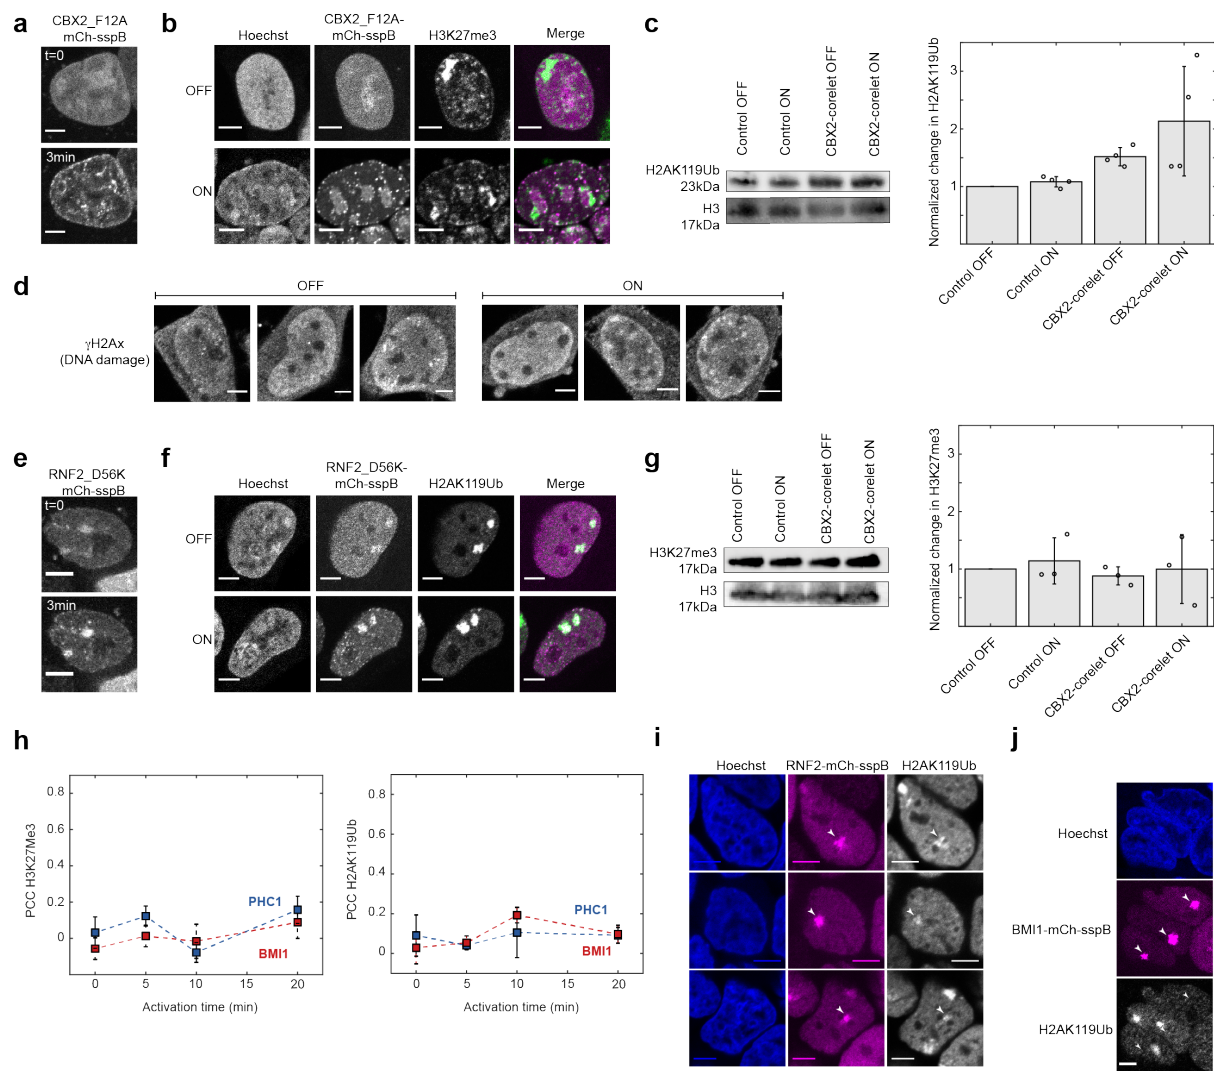

**Figure S3: Colocalization of PRC1 corelets with repressive histone marks.**

a. CBX2<sup>F12A</sup>-mCh-sspB (point mutation abolishes the ability to recognize the H3K27me3 histone mark) in HEK293 cells with NLS-Ferritin-Corelet before (t=0) and after blue light activation (3min). Scale bar is 5µm.

b. Immunofluorescence on the H3K27me3 mark in fixed CBX2<sup>F12A</sup>-mCh-sspB Corelet cells, before (OFF) and after (ON) activation. CBX2<sup>F12A</sup> does show increased colocalization with H3K27me3 marks. Scalebar is 5µm.

c. Western blot of control cells (GFP-corelet only) and CBX2-corelet cells, activated and non-activated. The H2AK119Ub mark increases when CBX2 is expressed and when condensates are activated. Included in the quantification are 4 biological replicates. Data are presented as mean values +/- SD.

d. Immunostain for γH2Ax, a DNA damage marker. The activation protocol does not increase DNA damage (compare OFF to ON). Scalebar is 5µm.

e. RNF2<sup>D56K</sup>-mCh-sspB (point mutation that abolishes the ability to write the H2AK119Ub mark) in HEK293 cells with NLS-Ferritin-Corelet before (t=0) and after blue light activation (3 min). Scalebar is 5µm.

f. Immunofluorescence on the H2AK119Ub mark in fixed RNF2<sup>D56K</sup>-mCh-sspB Corelet cells, before (OFF) and after (ON) activation. RNF2<sup>D56K</sup> moderately localizes with H2AK119Ub marks. Scalebar is 5µm.

g. Western blot of control cells (GFP-corelet only) and CBX2-corelet cells, activated and non-activated. The H3K27me3 does not appear to be increasing as CBX2 is

expressed and activated. Included in the quantification are 3 biological replicates. Data are presented as mean values +/- SD.

h. Pearson-correlation coefficient of PHC1- (n=6/6/6/8 for 0/5/10/20 minutes) and BMI1-corelets (n=7/9/5/11 cells for 0/5/10/20 minutes) with H3K27me3 (left panel) and PHC1- (n=8/3/7/14 for 0/5/10/20 minutes) and BMI1-corelets (n=10/11/4/18 cells for 0/5/10/20 minutes) with H2AK119Ub (right panel).

i. Three examples of the H2AK119Ub mark appearing where RNF2 is locally activated. In the bottom example, two inactive X-chromosomes are clearly distinguishable in addition to the activated spot. Scalebar is 5 $\mu$ m.

j. local activation of BMI1-condensates does not lead to writing of H2AK119Ub. Scalebar is 5 $\mu$ m.

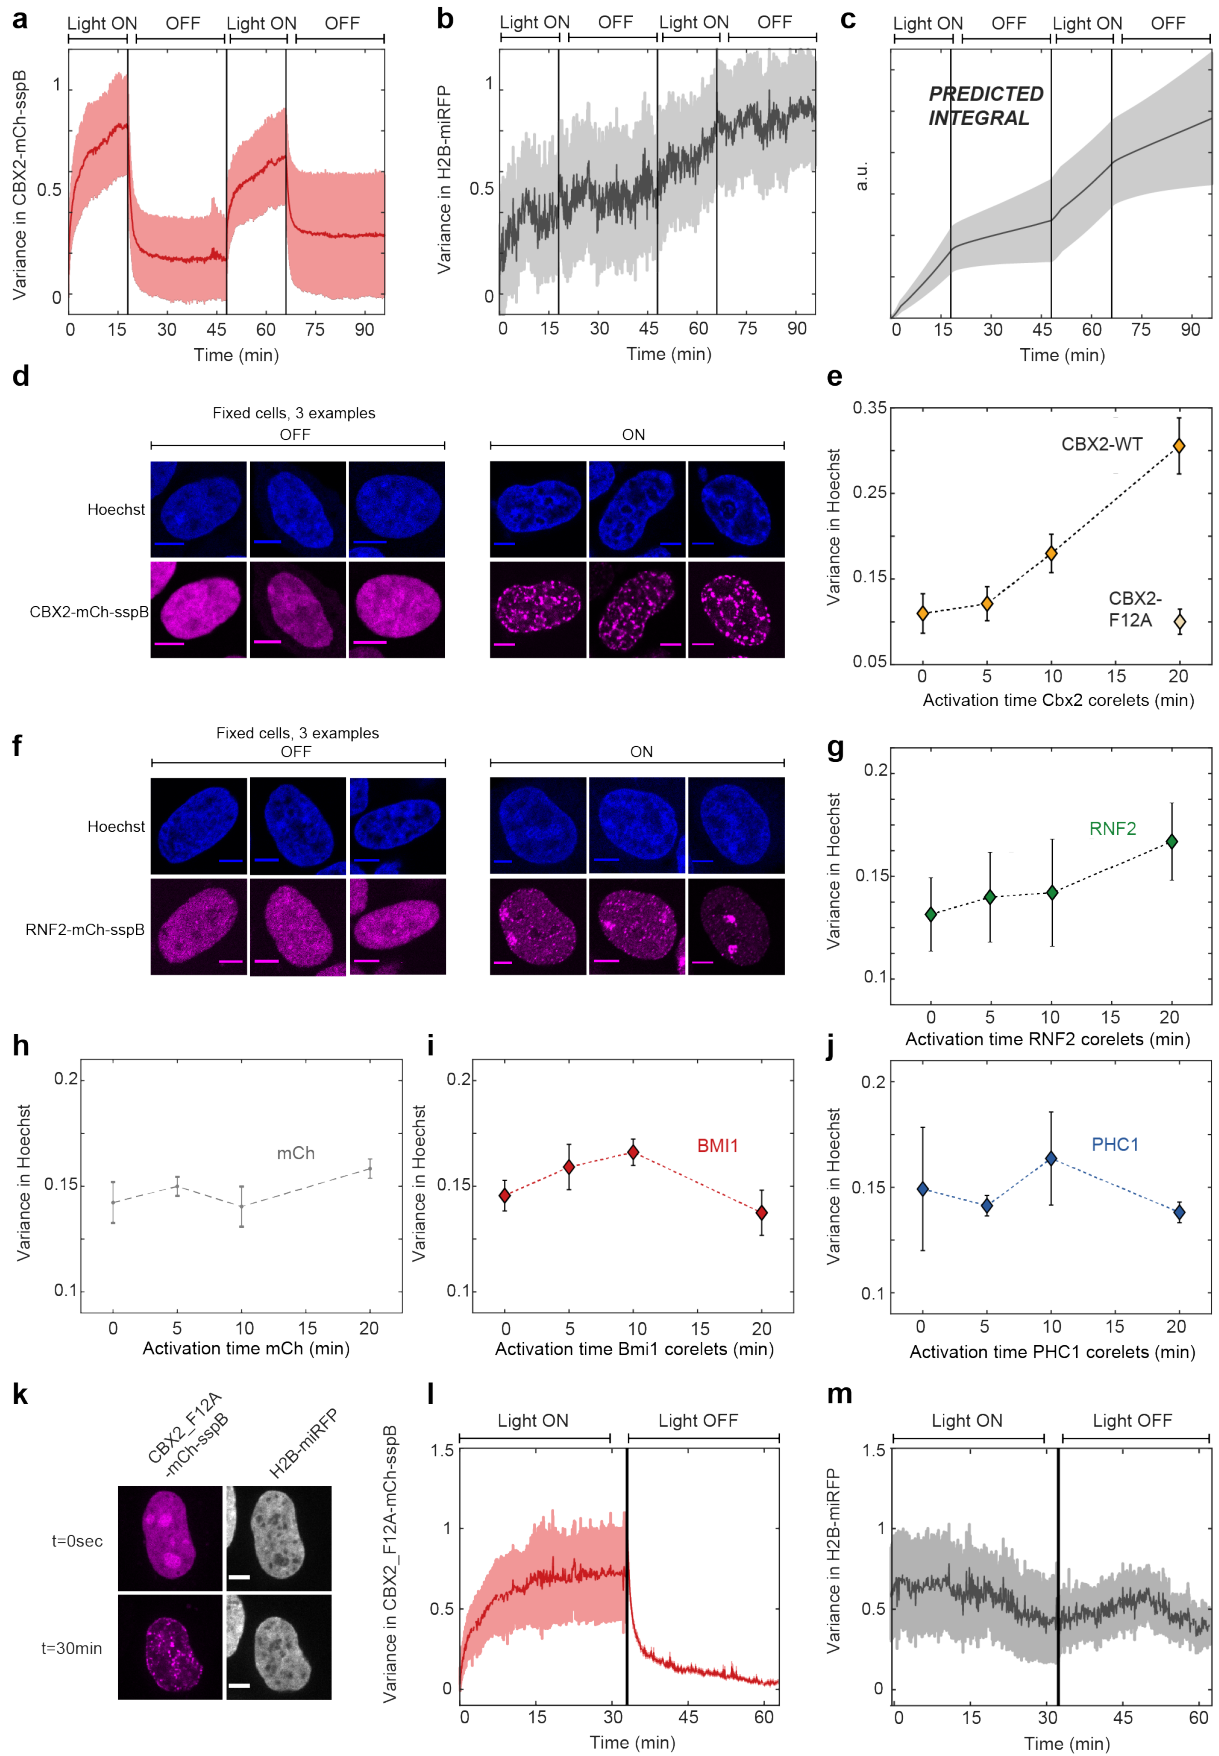

**Figure S4: Analysis of chromatin compaction after PRC1 corelet formation.**

- a. The variance in the CBX2-corelet signal increases as condensates form and decreases upon deactivation. Data are presented as mean  $\pm$  SD, n=29 cells.
- b. The variance in the H2B-miRFP goes up as condensates form, stays relatively stable as condensates disappear, and continues on when condensates appear again. Error band represents mean  $\pm$  SD.
- c. Integral of the CBX2 variance, showing that compaction sums over the prior history of CBX2 phase separation, even as compaction accumulates. Error band represents mean  $\pm$  SD.
- d. Fixed CBX2-mCh-sspB Corelet cells before (OFF) and after (ON) 20 minutes of activation, stained with Hoechst. Before activation CBX2-mCh-sspB associates with homogeneously distributed chromatin throughout the nucleus. After light activation, CBX2-Corelets compact chromatin locally. Scalebar is 5 $\mu$ m.
- e. Quantification of the variance in Hoechst increasing with CBX2-Corelet activation time (n=27/25/7/10 cells for 0/5/10/20 minutes). The CBX2-F12A mutant that is unable to interact with H3K27me3 shows compaction compared to the non-activated situation (n=18 cells). Data are presented as mean values  $\pm$  SD.
- f. Before activation (OFF) the RNF2-mCh-sspB is homogeneously distributed throughout the nucleus. After light activation, RNF2-Corelets partition onto the inactive X-chromosome and form small de novo puncta throughout the nucleus. There is little change in the Hoechst distribution. Scalebar is 5 $\mu$ m.
- g. Quantification of the variance in Hoechst increasing with RNF2-Corelet activation time (n=11/9/7/9 cells for 0/5/10/20 minutes). Data are presented as mean values  $\pm$  SD.
- h. Quantification of the variance in Hoechst increasing with mCh-Corelet activation time (n=6/7/5/6 cells for 0/5/10/20 minutes). Data are presented as mean values  $\pm$  SD.
- i. Quantification of the variance in Hoechst increasing with BMI1-Corelet activation time (n=7/9/8/11 cells for 0/5/10/20 minutes). Data are presented as mean values  $\pm$  SD.
- j. Quantification of the variance in Hoechst increasing with PHC1-Corelet activation time (n=6/6/6/8 cells for 0/5/10/20 minutes). Data are presented as mean values  $\pm$  SD.
- k. CBX2\_F12A-Corelet cell with H2B-miRFP before (t=0) and after activation (30 min). Scalebar is 5 $\mu$ m.
- l. The variance in the CBX2\_F12A signal increases rapidly as condensates form, and decreases upon deactivation. Data are presented as mean  $\pm$  SD, n=6 cells.
- m. The variance in the H2B-miRFP is unaffected by the condensates. Error band represents mean  $\pm$  SD.

## SUPPLEMENTARY TABLE 1

### List of plasmids

| Plasmid                                         | Source                   |
|-------------------------------------------------|--------------------------|
| FM5-NLS-iLID-mGFP-Fe                            | Sanders et al, Cell 2020 |
| FM5-NLS-iLID-Fe                                 | Sanders et al, Cell 2020 |
| FM5-BMI1-mCh-sspB                               | This paper               |
| FM5-BMI1-GFP                                    | This paper               |
| FM5-BMI1 $\Delta$ IDR-mCh-sspB (aa 1-250)       | This paper               |
| FM5-BMI1 $\Delta$ OD-mch-sspB (aa1-121+236-326) | This paper               |
| FM5-PHC1-mCh-sspB                               | This paper               |
| FM5-PHC1-GFP                                    | This paper               |
| FM5-PHC1 $\Delta$ OD-mCh-sspB (aa 1-939)        | This paper               |
| FM5-PHC1 $\Delta$ OD-GFP (aa 1-939)             | This paper               |
| FM5-CBX2-mCh-sspB                               | This paper               |
| FM5-CBX2-GFP                                    | This paper               |
| FM5-CBX2_F12A-mCh-sspB                          | This paper               |
| FM5-RNF2-mCh-sspB                               | This paper               |
| FM5-RNF2-GFP                                    | This paper               |
| FM5-RNF2_D56K-mCh-sspB                          | This paper               |
| H2B-miRFP670                                    | Shin et al, 2018, Cell   |

## SUPPLEMENTARY TABLE 2

### List of primers

| Name         | Sequence                                                           |
|--------------|--------------------------------------------------------------------|
| BMI1_FW      | ATCACCGGTAGCTAGCACCATGCATCGAACAACGAGAATC                           |
| BMI1_REV     | TACCACTACCGCTAGAACCAGAAGAAGTTGCTGA                                 |
| CBX2_FW      | ATCACCGGTAGCTAGCACCATGGAGGAGCTGAGCAGCGTG                           |
| CBX2_REV     | TACCACTACCGCTAGAGTAATGCCTCAGGTTGAA                                 |
| PHC1_FW      | ATCACCGGTAGCTAGCACCATGGAGACTGAGAGCGAGCAG                           |
| PHC1_REV     | TACCACTACCGCTAGAGGTCTCCTTGAGGACATT                                 |
| RNF2_FW      | ATCACCGGTAGCTAGCACCATGACTCAGGCTGTGCAGACA                           |
| RNF2_REV     | TACCACTACCGCTAGATTTGTGCTCCTTTGTAGG                                 |
| BMI1dIDR_REV | TACCACTACCGCTAGATTCCAGTTCTCCAGCATT                                 |
| BMI1dOD1     | CTCTCTGGTGACTGATTTTCATCCGCAACCTCTCC                                |
| BMI1dOD2     | AGAGGTTGCGGATGAAATCAGTCACCAGAGAGAT                                 |
| PHC1dOD_REV  | TACCACTACCGCTGGAACGGCTAGGATTACTGGA                                 |
| CBX2_F12A1   | ATCACCGGTAGCTAGCACCATGGAGGAGCTGAGCAGCGTGGGCGAGC<br>AGGTCGCCGCCGC   |
| CBX2_F12A2   | TAGTGGCCATCGATCGTGGTACCTCCTCGACTCGTCGCACCCGCTCGT<br>CCAGCGGCCGCCGC |
| RNF2_D56K1   | CCAATTTGTTTGAAGATGTTGAAGAAC                                        |
| RND2_D56K2   | GTTCTTCAACATCTTCAAACAAATTGG                                        |
